# Supplementary material
Source: Frontiers journal article supplement (https://www.frontiersin.org/articles/343396)
Supplement: Image_7.PDF [file Image_7.PDF]

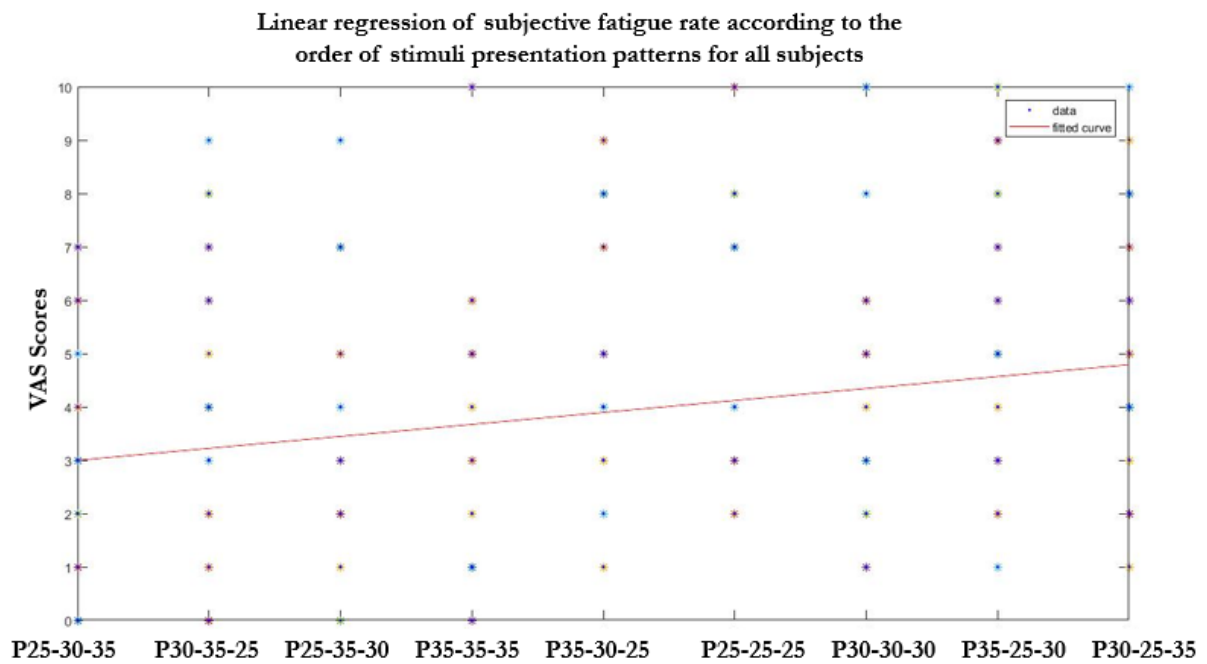

**Supplementary figure S7: Linear regression analysis for showing the trend of the subjective fatigue rate based on order of stimuli presentation.**
